# Supplementary material for: Mussels' acclimatization to high, variable temperatures is lost slowly upon transfer to benign conditions
Source: Oxford University Press journal article supplement (doi:10.1242/jeb.222893), 2020-01-01
Supplement: jeb222893supp.pdf [file jeb222893supp.pdf]

## SUPPLEMENTARY INFORMATION

Table S1. Number of mussels tested (*n*) each Week, based on Round and Zone

| Week           | Round 1   |           | Round 2   |           | Round 3   |           | Overall    |            |
|----------------|-----------|-----------|-----------|-----------|-----------|-----------|------------|------------|
|                | High Zone | Low Zone  | High Zone | Low Zone  | High Zone | Low Zone  | High Zone  | Low Zone   |
| 0              | 15        | 12        | 10        | 11        | 12        | 12        | 37*        | 35*        |
| 1              | 5         | --        | 6         | 12        | --        | --        | 11         | 12         |
| 2              | 5         | 6         | 6         | 6         | --        | --        | 11         | 12         |
| 3              | 10        | --        | --        | 12        | --        | --        | 10         | 12         |
| 4              | --        | --        | --        | --        | 11        | 11        | 11         | 11         |
| 5              | --        | --        | --        | --        | 12        | 11        | 12         | 11         |
| 6              | 5         | 6         | 6         | 6         | --        | --        | 11         | 12         |
| 7              | --        | --        | --        | --        | 10        | 10        | 10         | 10         |
| 8              | 6         | 5         | 6         | 6         | --        | --        | 12         | 11         |
| <b>Overall</b> | <b>46</b> | <b>29</b> | <b>34</b> | <b>53</b> | <b>45</b> | <b>44</b> | <b>125</b> | <b>126</b> |

*Note:* Data represent the sample sizes (*n*) of mussels tested each week during each of the three Rounds of 8 weeks of constant submersion (*n*=251 total mussels), including a baseline week (Week 0); data are separated by Zone (High or Low) for further clarity. Since only 6 mussels could be tested at any given time, and trials lasted ~4 hours total, we could not test all mussels from both zones in the same week for 8 consecutive weeks. Thus, for practical purposes, testing was split up across three different Rounds that were each 8 weeks long. For the regression analyses where a mean change score was calculated, each individual's value was subtracted from the Week 0 mean value (of all 12 mussels), that was specific to that individual's testing Round and Zone. \*Indicates that data from 12 mussels from each the high- and low-zone sites were randomly selected (from all three Rounds) to be used as the baseline group (Week 0) for the ANOVA analyses so that sample sizes were similar across the 9 weeks.

**Table S2. Mussel morphometric data separated by Zone and Week**

| Week    | Zone | Sample Size ( <i>n</i> ) | Body Mass (g) | Shell Height (mm) | Shell Length (mm) | Shell Width (mm) | Gonad mass (% total dry mass) |
|---------|------|--------------------------|---------------|-------------------|-------------------|------------------|-------------------------------|
| 0       | High | 12                       | 25.37±5.27    | 25.84±2.06        | 59.40±4.62        | 25.99±2.57       | 14.1±1.70                     |
|         | Low  | 12                       | 22.50±4.34    | 27.77±2.40        | 61.67±6.30        | 24.54±2.21       | 17.4±5.93                     |
| 1       | High | 11                       | 23.16±7.89    | 24.58±2.38        | 58.23±5.17        | 24.41±3.19       | 11.3±3.67                     |
|         | Low  | 12                       | 23.24±7.43    | 27.40±2.91        | 59.88±7.52        | 23.72±2.72       | 11.4±3.50                     |
| 2       | High | 11                       | 21.96±7.53    | 25.16±1.55        | 58.56±5.10        | 25.19±2.63       | 13.7±2.69                     |
|         | Low  | 12                       | 23.05±4.38    | 28.06±2.18        | 60.22±4.03        | 23.94±2.42       | 13.1±4.58                     |
| 3       | High | 10                       | 24.71±5.68    | 23.36±3.43        | 56.83±3.20        | 25.52±2.06       | 15.3±3.33                     |
|         | Low  | 12                       | 22.90±6.89    | 27.34±2.26        | 62.03±5.67        | 23.68±3.09       | 11.3±2.88                     |
| 4       | High | 11                       | 33.30±8.68    | 27.96±2.45        | 65.03±5.28        | 28.23±3.47       | 12.1±2.56                     |
|         | Low  | 11                       | 27.17±7.27    | 28.79±1.91        | 65.25±6.10        | 25.31±2.63       | 9.5±2.43                      |
| 5       | High | 12                       | 35.40±8.46    | 28.41±2.22        | 66.63±6.14        | 27.00±2.98       | 11.2±3.01                     |
|         | Low  | 11                       | 27.02±7.45    | 28.35±2.12        | 65.64±5.48        | 25.82±2.62       | 12.0±2.44                     |
| 6       | High | 11                       | 26.61±7.57    | 24.74±2.47        | 57.51±5.58        | 25.30±2.74       | 15.8±4.31                     |
|         | Low  | 12                       | 19.77±5.18    | 25.97±1.58        | 57.25±5.01        | 22.74±2.18       | 12.4±3.33                     |
| 7       | High | 10                       | 33.56±9.81    | 27.79±1.60        | 64.67±5.16        | 26.88±3.64       | 12.4±5.89                     |
|         | Low  | 10                       | 23.38±3.89    | 26.97±2.01        | 62.43±5.04        | 23.85±1.74       | 11.3±3.30                     |
| 8       | High | 12                       | 22.79±5.88    | 24.65±1.77        | 56.71±5.67        | 23.41±1.66       | 14.7±3.82                     |
|         | Low  | 11                       | 22.77±6.64    | 27.68±3.14        | 59.15±5.79        | 23.69±2.75       | 12.1±4.67                     |
| Overall | High | 100                      | 27.41±8.75*   | 26.01±2.62*       | 60.63±6.29        | 25.77±3.09*      | 13.4±3.79                     |
|         | Low  | 103                      | 23.47±6.25    | 27.58±2.37        | 61.43±6.09        | 24.15±2.58       | 12.3±4.24                     |

*Note:* Data are mean±s.d. \*Indicates a significant main effect of Zone overall (all  $P<0.05$ ). No significant interaction effects (Zone by Week) existed for any variables (see Table S4 for details). There was a significant main effect of Week for the following variables (all  $P<0.05$ ): body mass (Week 4 significantly differed from Weeks 1, 2, 6, & 8; and Week 5 significantly differed from Weeks 0-3, 6 & 8); shell length (Week 4 significantly differed from Weeks 1, 2, 6, & 8; Week 5 significantly differed from Weeks 0-3, 6, 8; and Week 7 significantly differed from Weeks 6 & 8); shell height (Weeks 4 & 5 significantly differed from Week 6); shell width (Week 4 significantly differed from Weeks 1 & 8, and Week 5 significantly differed from Week 8); gonad mass (Week 0 significantly differed from Weeks 1, 4, 5 & 7). However, none of the weekly differences in these variables appeared to affect cardiac thermal performance (see Results). See Table S4 for degrees of freedom,  $F$  values, and  $P$  values for all ANOVA analyses.

**Table S3. Absolute critical and flatline temperature data separated by Zone and Week**

| Week    | Zone | $T_{crit}$ (°C) | $T_{flat}$ (°C) | $T_{flat} - T_{crit}$<br>Difference (°C) |
|---------|------|-----------------|-----------------|------------------------------------------|
| 0       | High | 39.09±2.13      | 40.55±1.10      | 1.46±1.87                                |
|         | Low  | 36.79±2.31      | 40.32±1.74      | 3.51±2.70                                |
| 1       | High | 39.16±1.32      | 41.07±0.70      | 1.54±0.89                                |
|         | Low  | 37.87±1.33      | 40.47±0.94      | 2.59±1.46                                |
| 2       | High | 38.63±1.13      | 40.16±1.29      | 1.55±0.91                                |
|         | Low  | 38.03±1.08      | 40.84±0.70      | 2.82±0.94                                |
| 3       | High | 37.74±1.57      | 40.07±1.33      | 2.33±2.46                                |
|         | Low  | 35.29±2.65      | 39.81±0.83      | 4.53±2.31                                |
| 4       | High | 38.43±1.49      | 40.74±1.75      | 2.32±1.31                                |
|         | Low  | 37.86±1.66      | 40.61±0.81      | 2.69±2.08                                |
| 5       | High | 38.51±1.92      | 40.66±1.67      | 2.17±1.26                                |
|         | Low  | 36.53±3.00      | 41.22±1.49      | 4.90±2.28                                |
| 6       | High | 38.20±1.19      | 40.06±0.95      | 1.75±1.43                                |
|         | Low  | 36.40±2.24      | 39.56±1.37      | 3.19±2.82                                |
| 7       | High | 38.51±1.43      | 40.81±0.63      | 2.30±1.74                                |
|         | Low  | 37.90±2.56      | 41.28±1.77      | 3.41±2.28                                |
| 8       | High | 38.19±2.00      | 40.13±1.23      | 1.98±1.48                                |
|         | Low  | 37.71±2.29      | 39.87±1.63      | 2.30±1.48                                |
| Overall | High | 38.50±1.62*     | 40.47±1.25      | 1.93±1.52                                |
|         | Low  | 37.13±2.29      | 40.40±1.37      | 3.31±2.19*                               |

*Note:* Data are means±s.d.  $T_{crit}$  is critical temperature, and  $T_{flat}$  is flatline temperature. \*Indicates a main effect of Zone overall ( $P<0.05$ ).  $T_{crit}$  in Week 1 was significantly higher than Week 3 ( $P<0.05$ ). There were no other significant Zone by Week interaction effects, or significant main effects of Zone or Week (all  $P>0.05$ ). We were unable to identify the  $T_{flat}$  for six out of the 203 mussels, so the overall sample size is 197 individuals for  $T_{flat}$  and the  $T_{flat} - T_{crit}$  difference. See Table S4 for specific degrees of freedom,  $F$  values, and  $P$  values for the ANOVA analyses.

**Table S4. ANOVA statistical analyses for each variable.**

| <b>Variable</b>                                      | <b>Main effect of Zone<br/><i>F</i> and <i>P</i> values</b> | <b>Main effect of Week<br/><i>F</i> and <i>P</i> values</b> | <b>Zone by Week<br/>interaction<br/><i>F</i> and <i>P</i> values</b> |
|------------------------------------------------------|-------------------------------------------------------------|-------------------------------------------------------------|----------------------------------------------------------------------|
| <b>Body mass</b>                                     | $F=16.40, P<0.0001^*$                                       | $F=5.77, P<0.0001^*$                                        | $F=1.98, P=0.051$                                                    |
| <b>Shell Length</b>                                  | $F=1.84, P=0.18$                                            | $F=7.37, P<0.0001^*$                                        | $F=0.679, P=0.71$                                                    |
| <b>Shell Width</b>                                   | $F=16.67, P<0.0001^*$                                       | $F=3.68, P<0.001^*$                                         | $F=0.89, P=0.53$                                                     |
| <b>Shell Height</b>                                  | $F=28.27, P<0.0001^*$                                       | $F=5.38, P<0.0001^*$                                        | $F=2.39, P=0.018\dagger$                                             |
| <b>Gonad mass</b>                                    | $F=4.63, P=0.03\dagger$                                     | $F=4.04, P<0.001^*$                                         | $F=2.20, P=0.028\dagger$                                             |
| <b>Heating Rate</b>                                  | $F=0.09, P=0.76$                                            | $F=1.35, P=0.22$                                            | $F=0.65, P=0.73$                                                     |
| <b><math>T_{crit}</math></b>                         | $F=24.08, P<0.0001^*$                                       | $F=2.27, P=0.02^*$                                          | $F=0.96, P=0.47$                                                     |
| <b><math>T_{flat}</math></b>                         | $F=0.03, P=0.87$                                            | $F=2.67, P=0.01\dagger$                                     | $F=0.75, P=0.64$                                                     |
| <b><math>T_{flat}-T_{crit}</math><br/>difference</b> | $F=27.6, P<0.0001^*$                                        | $F=1.87, P=0.07$                                            | $F=1.06, P=0.39$                                                     |
| <b>Maximum HR</b>                                    | $F=0.05, P=0.83$                                            | $F=2.52, P=0.01\dagger$                                     | $F=0.45, P=0.87$                                                     |
| <b>Resting HR</b>                                    | $F=0.02, P=0.89$                                            | $F=2.34, P=0.02\dagger$                                     | $F=1.79, P=0.08$                                                     |
| <b>Total HR<br/>Range</b>                            | $F=0.23, P=0.63$                                            | $F=1.37, P=0.21$                                            | $F=1.06, P=0.39$                                                     |

*Note:* Data represent the *F* and *P* values for each of the ANOVA analyses for each of variables (listed in the left-hand column), regarding the main effect of zone (degrees of freedom = 1), main effect of Week (degrees of freedom = 8), and the Zone by Week interaction effects (degrees of freedom = 8). A two-way, between-between ANOVA (2-Zone by 9-Week) was run for each of the variables, and a  $P<0.05$  indicated significance. †Indicates no significant (meaningful) post-hoc differences when using a Bonferroni correction. \*Indicates significant post-hoc differences; see Tables S1 & S2, along with the Results section for details about actual values and post-hoc differences.  $T_{crit}$  is critical temperature, and  $T_{flat}$  is flatline temperature.
